# Supplementary material for: MicroRNA Expression in Clear Cell Renal Cell Carcinoma Cell Lines and Tumor Biopsies: Potential Therapeutic Targets
Source: MDPI journal article supplement (doi:10.3390/ijms23105604), 2022-05-17
Supplement: s1 [file s1]

|               |     |                                                                                   | Ref   | Target1 |          | Target2 |          | Target3 |          | Target4 |          | Target 5 |          |
|---------------|-----|-----------------------------------------------------------------------------------|-------|---------|----------|---------|----------|---------|----------|---------|----------|----------|----------|
| RNA Precursor |     |                                                                                   | U6    | miR17   | Fold Exp | miR19a  | Fold Exp | miR34a  | Fold Exp | miR155  | Fold Exp | miR210   | Fold Exp |
| GU1411        | STN | 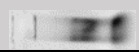 | 23.21 | 36.64   | 1        | 31.3    | 1        | 27.91   | 1        | 32.76   | 1        | 33.17    | 1        |
|               | STP |  | 24.61 | 36.82   | 1.987902 | 32.03   | 1.601288 | 26.41   | 3.848532 | 29.48   | 7.749479 | 31.66    | 3.863695 |
| GU1418        | STN |  | 21.49 | 30.29   | 1        | 29.26   | 1        | 25.91   | 1        | 30.47   | 1        | 31.1     | 1        |
|               | STP |  | 26.27 | 41.59   | 0.15632  | 34.14   | 1.951561 | 30.04   | 2.620972 | 33.11   | 4.708857 | 33.45    | 5.277642 |
| GU1436        | STN |  | 19.14 | 26.64   | 1        | 27.95   | 1        | 19.28   | 1        | 23.63   | 1        | 24.63    | 1        |
|               | STP |  | 18.24 | 26.62   | 0.619197 | 28.17   | 0.563434 | 17.63   | 1.175413 | 21.1    | 1.66139  | 20.5     | 3.116805 |
| GU1468        | STN |  | 18.58 | 26.98   | 1        | 28.51   | 1        | 19.93   | 1        | 23.61   | 1        | 25.12    | 1        |
|               | STP |  | 18.84 | 34.83   | 0.052547 | 29.66   | 0.732378 | 25.82   | 0.113571 | 29.28   | 0.123833 | 29.18    | 0.233229 |
| GU1508        | STN |  | 24.26 | 35.66   | 1        | 30.95   | 1        | 25.03   | 1        | 28.52   | 1        | 29.43    | 1        |
|               | STP |  | 21.99 | 32.7    | 0.93718  | 34.73   | 0.066192 | 17.59   | 5.456193 | 19.36   | 10.73052 | 20.46    | 9.958037 |
| GU1541        | STN |  | 18.31 | 26.98   | 1        | 27.05   | 1        | 21.9    | 1        | 24.81   | 1        | 24.8     | 1        |
|               | STP |  | 18.94 | 28.11   | 0.901853 | 28.14   | 0.916151 | 20.1    | 2.854325 | 24.37   | 1.672056 | 22.19    | 3.924914 |

Table S1. This table represents the number of PCR cycles for each miRs for the six patients included in the manuscript with the RNA pictures for the ribosomal RNA in the normal adjacent and the tumor tissues.
